# Supplementary material
Source: PubMed Central journal article supplement (PMC3691349)
Supplement: NIHMS479679-supplement-1.pdf [file NIHMS479679-supplement-1.pdf]

**Table A1.** Summary of individual regression variables. Brief description of each of the variables discussed, including: retinal image quality, LOCS-III, and forward scatter metrics. The retinal image quality metrics are described in detail in reference 5, the LOCS-III metrics in reference 27, and the forward scatter metrics in reference 35. Not all commonly used retinal image quality and forward scatter metrics are described in this table, and references 5 and 35, respectively, may be consulted for more complete accountings of such metrics.

| Category                      | Metric                                                                                                                                                       | Definition                                                                                                                                                                                                      |
|-------------------------------|--------------------------------------------------------------------------------------------------------------------------------------------------------------|-----------------------------------------------------------------------------------------------------------------------------------------------------------------------------------------------------------------|
|                               | Age                                                                                                                                                          | Age at study entry                                                                                                                                                                                              |
| Retinal image quality metrics | AreaMTF                                                                                                                                                      | Image quality metric calculated as the area of the modulation transfer function (MTF) lying below the radial average and above the neural contrast threshold (area of visibility), diffraction limit normalized |
|                               | Coma                                                                                                                                                         | Wavefront error mode calculated as the root mean square magnitude of horizontal and vertical coma calculated from the Zernike coefficients as $[(C_3^{-1})^2 + (C_3^1)^2]^{0.5}$ (microns)                      |
|                               | D50                                                                                                                                                          | Image quality metric calculated as the diameter of a circular area centered on the PSF peak and capturing 50% of the PSF light energy (arcmin)                                                                  |
|                               | ENT                                                                                                                                                          | Image quality metric calculated as the entropy of the retinal PSF                                                                                                                                               |
|                               | HOA                                                                                                                                                          | Wavefront error metric calculated as the root mean square error of all aberrations between the 3 <sup>rd</sup> and 10 <sup>th</sup> radial order (microns)                                                      |
|                               | SM                                                                                                                                                           | Image quality metric calculated as the square root of the second moment of the light distribution of the retinal PSF (arcmin)                                                                                   |
|                               | Spherical aberration                                                                                                                                         | Wavefront error mode calculated from the Zernike coefficients as $[(C_4^0)^2]^{0.5}$ (microns)                                                                                                                  |
|                               | SRMTF                                                                                                                                                        | Strehl ratio computed in the frequency domain using the MTF method                                                                                                                                              |
|                               | STD                                                                                                                                                          | Standard deviation of the intensity values in the PSF                                                                                                                                                           |
|                               | Trefoil                                                                                                                                                      | Wavefront error mode calculated from the Zernike coefficients as $[(C_3^{-3})^2 + (C_3^3)^2]^{0.5}$ (microns)                                                                                                   |
| VSMTF                         | Image quality metric calculated as the visual Strehl computed in the frequency domain, where the MTF is weighted by the neural contrast sensitivity function |                                                                                                                                                                                                                 |
| LOCS-III                      | C                                                                                                                                                            | LOCS-III subjective measure of cortical lens changes with respect to a set of reference photos                                                                                                                  |
|                               | NO                                                                                                                                                           | LOCS-III subjective measure of nuclear opalescence of the lens with respect to a set of reference photos                                                                                                        |
|                               | NC                                                                                                                                                           | LOCS-III subjective measure of lens color with respect to a set of reference photos                                                                                                                             |
|                               | P                                                                                                                                                            | LOCS-III subjective measure of posterior subcapsular lens changes with respect to a set of reference photos                                                                                                     |
| Forward Scatter               | Max_Max                                                                                                                                                      | Maximum pixel value in the Shack-Hartmann spot image                                                                                                                                                            |
|                               | Max_Mean                                                                                                                                                     | Maximum mean pixel value of all PSFs in the Shack-Hartmann spot image                                                                                                                                           |
|                               | Max_SD                                                                                                                                                       | Maximum standard deviation of pixel values of all PSFs in the Shack-Hartmann spot image                                                                                                                         |
|                               | Mean_Mean                                                                                                                                                    | Mean of the mean pixel values of all PSFs in the Shack-Hartmann spot image                                                                                                                                      |
